1 Lockdown, relaxation, and ACME period in COVID-19: A  
2 study of disease dynamics on Hermosillo, Sonora, Mexico

3 Mayra R. Tocto-Erazo<sup>1</sup>, Jorge A. Espíndola-Zepeda<sup>1</sup>, José A. Montoya-Laos<sup>1</sup>,  
Manuel A. Acuña-Zegarra<sup>1</sup>, Daniel Olmos-Liceaga<sup>1</sup>, Pablo A. Reyes-Castro<sup>2</sup>,  
Gudelia Figueroa-Preciado<sup>1\*</sup>

1 Departamento de Matemáticas, Universidad de Sonora, Blvd. Rosales y Luis Encinas S/N,  
Hermosillo, Sonora, C.P. 83000, México.

2 Centro de Estudios en Salud y Sociedad, El Colegio de Sonora, Av. Obregón 54,  
Hermosillo, Sonora, C.P. 83000, México.

4 **Abstract**

5 Lockdown and social distancing measures have been implemented for many countries to mitigate  
6 the impacts of the COVID-19 pandemic and prevent overwhelming of health services. However,  
7 success on this strategy depends not only on the timing of its implementation, but also on the re-  
8 laxation measures adopted within each community. At the request of Sonoran Health Ministry,  
9 we developed a mathematical model to evaluate the impacts of the lockdown implemented in Her-  
10 mosillo, Mexico. We compared this intervention with some hypothetical ones, varying the starting  
11 date and also the population proportion that is released, breaking the confinement. For this pur-  
12 pose, a Monte Carlo study was performed by considering three scenarios to define our baseline  
13 dynamics. Results showed that a hypothetical delay of two weeks, on the lockdown measures,  
14 would result in an early ACME around May 9 for hospitalization prevalence and an increase on  
15 cumulative deaths, 42 times higher by May 31, when compared to baseline. On the other hand,  
16 in respect of relaxation dynamics, the ACME levels depend on the proportion of people who gets  
17 back to daily activities or the individual behavior regarding prevention measures. It is important  
18 to stress that, according to information provided by health authorities, the ACME occurring time  
19 was closed to the one given by our model. Hence, we considered that our model resulted useful for  
20 the decision-making assessment, and that an extension of it can be used for the study of a potential  
21 second wave.

## 1 Introduction

In late December 2019, a novel coronavirus SARS-CoV-2 (severe acute respiratory syndrome coronavirus 2) was first reported in Wuhan, China [1, 2]. Since then, the pandemic of Coronavirus Disease (COVID-19) has spread in 188 countries, with 21,809,170 millions of infections and 772,452 deaths registered worldwide [3]. Mexico reported its first case in late February 2020, and by the middle of August, public health authorities confirmed around 525,733 infections and more than 57,023 deaths [4]. Based on their clinical manifestations, cases have ranged from mild/moderate to severe, and even some in critical conditions. Severity illness and risk of mortality increase by age and also by the presence of some underlying conditions like hypertension, diabetes, cardiovascular, and cerebrovascular disease [5]. COVID-19 most common symptoms are fever, fatigue, dry cough, myalgia, and severe cases frequently include dyspnea and/or hypoxemia [5, 6, 7].

SARS-CoV-2, the virus that causes COVID-19, is highly infectious and spreads predominantly from person-to-person. In the absence of a vaccine or an effective treatment, some non-pharmaceutical community strategies like isolation, testing, contact tracing, and physical distancing have been the main interventions adopted by most of the nations to mitigate this pandemic and reduce the velocity of transmission [8, 9]. From the middle of March to May 30th, Mexican Ministry of Health implemented a National Campaign for Healthy Distance (Jornada Nacional de Sana Distancia), a public health intervention based on physical distancing measures, closing schools as well as non-essential workplaces, and asking for citizens to stay-at-home [10]. However, federal measures demand not only a strong inter-jurisdictional coordination between national, state, and local government levels [11], but also a comprehensive understanding of the disease transmission dynamic, to achieve timely interventions within each locality.

The comprehension of this pandemic has grab the interest of many scientific areas, mainly with the aim of providing ideas that could reduce the severity of the disease. In particular, the area of mathematical modeling has drawn the attention during this epidemic mostly due to its usefulness in providing information about the evolution of transmissible diseases. Current work is focused on parameter estimation that serves as a basis for more complex studies [12], the evaluation of non-pharmacological interventions during the epidemic, such as social distancing or lockdown [13, 14, 15, 16, 17] and forecast short term trends of the disease [18]. In general, one of the main purposes of mathematical models has been the evaluation of the effects of different governmental interventions and also providing to decision-makers with more elements for responding to a need, in a more conscious manner [19].

This work aims to evaluate the lockdown and relaxation measures implemented in Hermosillo, Sonora, Mexico. In order to reach our purpose, we developed a mathematical model of the Kermack-McKendrick type. We used some statistical techniques to have the profile of a baseline scenario for being compared with some hypothetical ones, varying the starting date and the population proportion released, breaking the confinement. It is known that COVID-19 predictions are not an easy task, even if data is available from the beginning of the epidemic [20]. Nevertheless, in our case, data availability made possible to uncover robust information that was useful for decision-making.

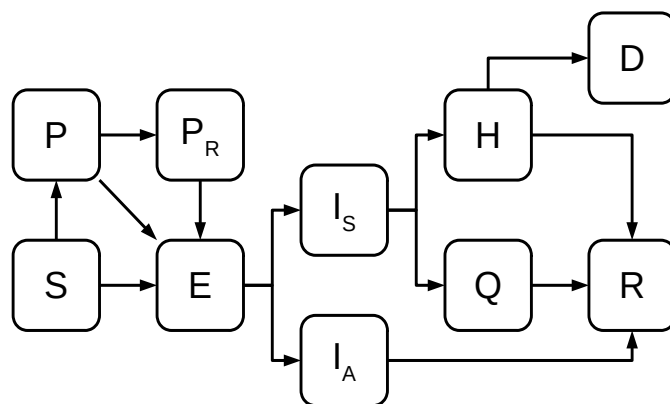

Figure 1: **Flow diagram of the mathematical model.**  $S, E, I_A, I_S, H, Q, R, D$  represent the populations of susceptible, exposed, asymptotically infected, symptomatically infected, hospitalized, quarantined, recovered and dead individuals, respectively. Protected individuals ( $P$ ) get involved in the disease dynamics when mitigation measures are implemented, whereas released population ( $P_R$ ) does so when relaxation of these measures occurs.

1 Our manuscript is organized as follows. Initially, we present our proposed mathematical model.  
2 Then, statistical analyses of different parameter scenarios, that validate the data, are presented. A  
3 discussion about the results obtained with the adjusted models is included. Our results arise from  
4 the statistical and modeling perspectives and are related to the ACME occurring time, implications  
5 of lockdown occurrence time, and consequences of the lifting mitigation measures. Finally, we end  
6 up with a discussion section.

## 7 **2 Methods**

### 8 **2.1 Compartmental mathematical model**

9 We formulate a compartmental mathematical model, whose diagram can be observed in Fig 1,  
10 where susceptible ( $S$ ), exposed ( $E$ ), asymptomatic infectious ( $I_a$ ), symptomatic infectious ( $I_s$ ),  
11 recovered ( $R$ ), quarantined ( $Q$ ), hospitalized ( $H$ ), and dead individuals ( $D$ ) are considered.  $P$  rep-  
12 represents a proportion of individuals in the population that decided to stay at home in order to protect  
13 themselves from illness, and  $P_R$  are those released from the  $P$  class, when certain proportion of  
14 protected individuals needed or decided to break control measures.

15 To formulate the mathematical model, we considered that susceptible individuals are moved  
16 to the protected class when they obey the mitigation measures implemented by the government  
17 and some become infected when interacting with an infectious individual. Dynamics of protected  
18 individuals is similar; that is, they either can become infected or moved to the protected released  
19 class. In the former case, they become infected when interacting with an infectious individual,

1 while the latter one is a result of a mitigation measures break up (a proportion of the protected pop-  
 2 ulation returns to their usual activities). On the other hand, protected released people only leave  
 3 the class by the interplay with symptomatic or asymptomatic individuals (becoming infected). The  
 4 exposed class represents individuals that are infected but not infectious. After a while, an exposed  
 5 individual can become infectious, asymptomatic, mildly symptomatic, or severe symptomatic. As  
 6 a first approximation and to analyze data of a specific Mexican state, we considered that the stages  
 7 previously mentioned are grouped into two classes: i) asymptomatic people ( $I_A$ ), and severe symp-  
 8 tomatic people ( $I_S$ ). We assumed that mildly symptomatic people can be distributed in both classes.  
 9 People from  $I_A$  class are recovered with a mean time equal to  $1/\eta_a$ . In contrast, individuals from  
 10  $I_S$  class are identified as infected after  $1/\gamma_s$  days (on average), after which they are reported and  
 11 become hospitalized or quarantined/ambulatory. We considered that ambulatory individuals might  
 12 recover or worsen their condition, being then hospitalized. This happens after  $1/\psi$  days (on av-  
 13 erage). Finally, we assumed that only hospitalized individuals may die, and that occurs after  $1/\mu$   
 14 days, on average.

Following the hypotheses previously stated, the mathematical model is given by

$$\begin{aligned}
 \dot{S} &= -\left(\frac{\alpha_a I_A + \alpha_s I_S}{N^*}\right)S - \omega_1(t)S \\
 \dot{P} &= \omega_1(t)S - \left(\frac{\tilde{\alpha}_a I_A + \tilde{\alpha}_s I_S}{N^*}\right)P - \omega_2(t)P \\
 \dot{P}_R &= \omega_2(t)P - \left(\frac{\hat{\alpha}_a I_A + \hat{\alpha}_s I_S}{N^*}\right)P_R \\
 \dot{E} &= \left(\frac{\alpha_a I_A + \alpha_s I_S}{N^*}\right)S + \left(\frac{\tilde{\alpha}_a I_A + \tilde{\alpha}_s I_S}{N^*}\right)P + \left(\frac{\hat{\alpha}_a I_A + \hat{\alpha}_s I_S}{N^*}\right)P_R - \delta E \\
 \dot{I}_A &= (1 - \theta)\delta E - \eta_a I_A \\
 \dot{I}_S &= \theta\delta E - \gamma_s I_S \\
 \dot{H} &= \beta\gamma_s I_S + \tau\psi Q - \mu H \\
 \dot{Q} &= (1 - \beta)\gamma_s I_S - \psi Q \\
 \dot{R} &= \eta_a I_A + (1 - \nu)\mu H + (1 - \tau)\psi Q \\
 \dot{D} &= \nu\mu H
 \end{aligned} \tag{2.1}$$

15 where  $N^* = S + E + I_A + I_S + R + P + P_R$ . It is important to emphasize that the infection contact rates of  
 16 released protected people are less or equal than the infection contact rates of susceptible individuals.  
 17 On the other hand,  $\nu$  and  $(1 - \nu)$  represent the proportion of hospitalized individuals that recover  
 18 or die, respectively. Likewise,  $\tau$  and  $(1 - \tau)$  are the proportions of ambulatory individuals who are  
 19 hospitalized and recovered, respectively. Other parameters definition can be seen in Table 1.

### 20 2.1.1 Modeling the effects of intervention measures

21 As happened in other countries, Mexico also implemented control measures to fight against CoVID-  
 22 19. These intervention measures are mainly based on social distancing, in order to reduce contact

| Parameter                                      | Definition                                                                                                          |
|------------------------------------------------|---------------------------------------------------------------------------------------------------------------------|
| $\alpha_a, (\tilde{\alpha}_a, \hat{\alpha}_a)$ | Transmission contact rates for susceptible (protected, protected released) class linked to asymptomatic individuals |
| $\alpha_s, (\tilde{\alpha}_s, \hat{\alpha}_s)$ | Transmission contact rates for susceptible (protected, protected released) class linked to symptomatic individuals  |
| $\delta$                                       | Incubation rate                                                                                                     |
| $\theta$                                       | Proportion of symptomatic individuals                                                                               |
| $\eta_a$                                       | Recovery rate for asymptomatic individuals                                                                          |
| $\gamma_s$                                     | Output rate from the symptomatic class by register                                                                  |
| $\beta$                                        | Proportion of hospitalized individuals                                                                              |
| $\psi$                                         | Output rate from the quarantined class by hospitalization/recovery                                                  |
| $\mu$                                          | Output rate from the hospitalized class by recovery/death                                                           |

Table 1: System 2.1 parameter definition and their description.

1 between people. However, not all Mexican States started these control measures at the same time.

The implementation of social distancing resulted in a proportion of the population being protected by staying at home. For that reason, we modeled this event considering that susceptible individuals moved to the protected class during some period. This phenomenon occurs until a certain percentage of the population is reached. We represent this period by  $[T_{L_1}, T_{U_1}]$ . The mathematical description of the dynamics is given by

$$\omega_1(t) = \begin{cases} 0 & , \quad 0 \leq t < T_{L_1}, \\ w_{10} & , \quad T_{L_1} \leq t < T_{U_1}, \\ 0 & , \quad T_{U_1} \leq t, \end{cases} \quad (2.2)$$

and parameter  $w_{10}$  represents the protection rate of susceptible individuals per unit of time. On the other hand, at the moment of writing this paper, it has been observed that many people who were initially obeying mitigation measures have now broken the confinement, going back to their usual activities. For that reason, we consider that certain proportion of protected people become protected released people. We model this phenomenon in a similar way to the one presented in previous function. Thus

$$\omega_2(t) = \begin{cases} 0 & , \quad 0 \leq t < T_{L_2}, \\ w_{20} & , \quad T_{L_2} \leq t < T_{U_2}, \\ 0 & , \quad T_{U_2} \leq t. \end{cases} \quad (2.3)$$

2 Here, period from  $T_{L_2}$  to  $T_{U_2}$  represents the time in which a percentage of the population that breaks  
3 the confinement is reached.

4 **Remark 1** In order to select  $w_{10}$  and  $w_{20}$  we follow the classical population decay equation  $\frac{dX}{dt} =$   
5  $-w_{i0}X$  and take the value of  $w_{i0}$  such that a given proportion of  $X$  leaves the class  $X$  in a given time  
6 interval.

## 1 2.2 Monte Carlo Study

2 We performed a Monte Carlo study where different distributions were considered for the parameters  
3 included in the mathematical model presented in System 2.1. The election of these distributions re-  
4 lied not only on the researcher knowledge but also in an extensive search in related literature. Three  
5 different scenarios were considered when fitting some epidemic curves derived from this mathe-  
6 matical model (System 2.1), to the data observed in Hermosillo, Sonora (considering a constraint  
7 on the prevalence of COVID-19). As a result of the analyses performed by these three researchers  
8 (Scenario 1, Scenario 2 and Scenario 3) we obtained quantile-based intervals, where model param-  
9 eters can range. These possible parameter values allowed us to explore not only characteristics of  
10 the COVID-19 outbreak in Hermosillo, Sonora, like the ACME value and ACME date, but also we  
11 were able to explore different intervention schemes such as: changes in the beginning and lifting  
12 restriction dates, variation in the population proportions that return to usual activities on June 01,  
13 2020 (a date fixed by Federal Government), and also the possibility of exploring some other periods  
14 where people break the confinement.

15 The Monte Carlo method that was considered here for exploring epidemic characteristics of the  
16 COVID-19 outbreak consists of the following steps.

17 • **Initial conditions for the model:** According to the Mexican National Population Council  
18 (CONAPO), projections for 2020 population in Hermosillo is about 930669 people [21].  
19 Regarding the first COVID-19 case registered in Hermosillo by the Sonoran Health System,  
20 it occurred in March 16, 2020, being March 11 the registered date of onset symptoms. In this  
21 way, we considered March 11 as the starting date for simulations, with the following initial  
22 conditions:  $S(0) = 930668$ ,  $I_s(0) = 1$ , and  $E(0) = I_a(0) = H(0) = D(0) = Q(0) = R(0) =$   
23  $P(0) = P_L(0) = 0$ .

24 • **On-and-off periods of social distancing:** On March 16, date of the first coronavirus case  
25 in Sonora, a mandatory confinement was declared by the state governor. This statewide  
26 stay-home directive was intended to avoid the spread of this coronavirus. Nevertheless, even  
27 on May 6, 2020, Sonora State government divulged a video message asking citizens for  
28 remaining in quarantine and taking social distancing seriously, since a considerable increase  
29 in the number of cases were occurring.

30 Considering the above information, we assumed that the period from March 16 to April  
31 15 was the first period of social distancing, where a considerable proportion of susceptible  
32 population became protected, thus  $[T_{L_1}, T_{U_1}] = [5, 35]$ . A second period of social distancing  
33 was fixed from April 30 to May 15, that is  $[T_{L_2}, T_{U_2}] = [50, 65]$ . It is important to point  
34 out that our motivation for considering periods instead of specific dates for breaking the  
35 confinement, is supported by the occurrence of two important dates in Mexico, children's  
36 day (April 30) and mother's day (May 10).

37 • **Model parameter distributions:** We set three different scenarios where different probabil-  
38 ity distributions were considered for modeling parameters included in System 2.1. These

1 parameters, as well as their selected distributions, are shown in Table 2.

| Parameter          | Scenario 1                                | Scenario 2                                    | Scenario 3                            |
|--------------------|-------------------------------------------|-----------------------------------------------|---------------------------------------|
| $\alpha_a$         | $\mathcal{N}_{1.22,1.27}(1.2458, 0.0115)$ | $\mathcal{N}_{1.2440,1.5653}(1.3879, 0.125)$  | $\mathcal{N}_{0,\infty}(1.198, 0.05)$ |
| $\alpha_s$         | $\mathcal{N}_{1.10,1.30}(1.2076, 0.0464)$ | $\mathcal{N}_{0.8759,0.9949}(0.9149, 0.06)$   | $\mathcal{N}_{0,\infty}(0.657, 0.05)$ |
| $\tilde{\alpha}_a$ | $\mathcal{N}_{0,0.04}(0.0074, 0.0114)$    | $\mathcal{N}_{0,0.0150}(0.0064, 0.175)$       | $\mathcal{N}_{0,\infty}(0.02, 0.05)$  |
| $\tilde{\alpha}_s$ | $\mathcal{N}_{1.19,1.21}(1.2010, 0.0042)$ | $\mathcal{N}_{0.2889,0.5433}(0.4194, 0.20)$   | $\mathcal{N}_{0,\infty}(0.02, 0.05)$  |
| $\hat{\alpha}_a$   | $\mathcal{U}(0.05, 0.25)$                 | $\mathcal{N}_{0.0009,0.0784}(0.0167, 0.045)$  | $\mathcal{N}_{0,\infty}(0.02, 0.05)$  |
| $\hat{\alpha}_s$   | $\mathcal{N}_{0.46,0.66}(0.5839, 0.0509)$ | $\mathcal{N}_{0.7368,0.9789}(0.8772, 0.175)$  | $\mathcal{N}_{0,\infty}(0.02, 0.05)$  |
| $\delta$           | $\mathcal{N}_{0.25,0.35}(0.2923, 0.0211)$ | $\mathcal{N}_{0.1703,0.2529}(0.1990, 0.040)$  | $\mathcal{IG}(25, 5)$                 |
| $\theta$           | $\mathcal{U}(0.01, 0.2)$                  | $\mathcal{N}_{0.2253,0.3737}(0.2618, 0.085)$  | $\mathcal{U}(0.17, 0.25)$             |
| $\eta_a$           | $\mathcal{N}_{0.08,0.2}(0.1503, 0.025)$   | $\mathcal{N}_{0.04,0.067}(0.0456, 0.02)$      | $\mathcal{IG}(105, 10)$               |
| $\gamma_s$         | $\mathcal{U}(0.5, 2)$                     | $\mathcal{N}_{0.7055,1.9143}(1.2415, 0.4)$    | $\mathcal{IG}(3, 1)$                  |
| $\beta$            | $\mathcal{U}(0.14, 0.25)$                 | $\mathcal{N}_{0.0727,0.1313}(0.1002, 0.055)$  | $\mathcal{B}(8, 50)$                  |
| $\tau$             | $\mathcal{U}(0, 0.2)$                     | $\mathcal{N}_{0.0277,0.0997}(0.0589, 0.035)$  | $\mathcal{U}(0.1, 0.3)$               |
| $\psi$             | $\mathcal{U}(0.01, 1)$                    | $\mathcal{N}_{0.05,0.16}(0.1062, 0.1)$        | $\mathcal{U}(0.06, 0.1)$              |
| $\mu$              | $\mathcal{U}(0.1, 0.8)$                   | $\mathcal{N}_{0.0615,0.14}(0.1146, 0.05)$     | $\mathcal{U}(0.05, 0.1)$              |
| $\pi$              | $\mathcal{U}(0.14, 0.3)$                  | $\mathcal{N}_{0.0901,0.2472}(0.1550, 0.04)$   | $\mathcal{U}(0.2, 0.4)$               |
| $w_{10}$           | $\mathcal{U}(0.04, 0.08)$                 | $\mathcal{N}_{0.0754,0.0864}(0.0809, 0.0075)$ | $\mathcal{U}(0.04, 0.08)$             |
| $w_{20}$           | $\mathcal{U}(0.003, 0.015)$               | $\mathcal{N}_{0.0001,0.0320}(0.0019, 0.0175)$ | $\mathcal{U}(0.007, 0.03)$            |

Table 2: Model parameter distributions. Here,  $\mathcal{N}_{a,b}(\mu_0, \sigma_0)$  is the truncated normal distribution with a truncation range  $(a, b)$ , where  $\mu_0$  and  $\sigma_0$  are the mean and variance of this distribution;  $\mathcal{IG}(\alpha_0, \beta_0)$  is the inverse gamma distribution with shape and scale parameters  $\alpha_0, \beta_0$ , respectively;  $\mathcal{B}(a, b)$  is the Beta distribution with parameters  $a$  and  $b$ ;  $\mathcal{U}(\min, \max)$  is a uniform distribution on an interval that goes from min to max.

2 Heuristic analysis was used by three different researchers, in order to propose the scenarios  
3 presented in Table 2. Basically, the strategy was to delimit the support of these distributions,  
4 either by considering a wide range for parameter values or by selecting these ranges based  
5 on a bibliographic review. The fit of the model solutions, to the initially reported data, was  
6 done either manually (visual-fit), through a shiny app created in Rstudio (script available on  
7 a Github repository [22]), and also by minimizing the sum of squared errors. The values and  
8 ranges of model parameters that were taken as a starting point to specify the support of these  
9 distributions, are shown in Table 3. Some of these can be found on COVID-19 literature and  
10 some others have been assumed by the authors.

11 Distributions for  $w_{10}$  and  $w_{20}$  parameters, were obtained as follows. In the first scenario, a  
12  $\mathcal{U}(0.7, 0.9)$  distribution is considered for the protected proportion of susceptible individuals  
13 and a  $\mathcal{U}(0.1, 0.35)$  distribution for the proportion of people who have broken the confine-  
14 ment. Once we have a sample for each one of these proportions, we applied to these samples  
15 the equation presented on Remark 1, considering that protected and released population pro-



1 portions are achieved within 30 and 15 days, respectively. The values obtained for  $w_{10}$  and  
 2  $w_{20}$  allowed us to propose the corresponding distributions given in Table 2 as well as the  
 3 parameters ranges shown in Table 3. A similar procedure was carried out to obtain the  
 4 distributions for parameters  $w_{10}$  and  $w_{20}$  in the second scenario, except that a  $\mathcal{U}(0.05, 0.2)$   
 5 distribution is considered for the proportion of people who have broken the confinement.  
 6 For the third scenario, a  $\mathcal{B}(0.8, 0.05)$  distribution was used to describe the protected propor-  
 7 tion of susceptible individuals and a  $\mathcal{B}(0.05, 0.2)$  distribution for the proportion of people  
 8 who have broken the confinement. Unlike the first two scenarios, time periods to achieve  
 9 the percentages of protected and released populations are given by  $\mathcal{U}(21, 32)$  and  $\mathcal{U}(7, 16)$   
 10 distributions, respectively. A strategy, similar to the one described in the first two scenarios,  
 11 was considered to obtain the distributions given in Table 2 and parameters ranges shown in  
 12 Table 3.

| Parameter          | Scenario 1                                   | Scenario 2                        | Scenario 3                   |
|--------------------|----------------------------------------------|-----------------------------------|------------------------------|
| $\alpha_a$         | 0.0616–1.5879 [23]                           | 0.0616–1.5879 [23]                | 0.5944–1.68 [16]             |
| $\alpha_s$         | 0.0616–1.5879 [23]                           | 0.0616–1.5879 [23]                | 0.5944–1.68 [16]             |
| $\tilde{\alpha}_a$ | 0–1.5*                                       | 0.0616–1.5879 [23]                | 0–0.5*                       |
| $\tilde{\alpha}_s$ | 0–1.5*                                       | 0.0616–1.5879 [23]                | 0–0.5*                       |
| $\hat{\alpha}_a$   | 0–1.5*                                       | 0.0616–1.5879 [23]                | 0–0.5*                       |
| $\hat{\alpha}_s$   | 0–1.5*                                       | 0.0616–1.5879 [23]                | 0–0.5*                       |
| $1/\delta$         | 5 [24]; 6 [25]<br>0.04–25 [23];              | 3.78–6.78 [26];<br>3.01–4.91 [26] | 2–14 [27]                    |
| $\theta$           | 0.10–0.95 [28];<br>0.80–0.85 [29]            | 0.25–0.90 [28]                    | 0–0.8*                       |
| $1/\eta_a$         | 7 [28]; 14 [30]                              | 22.9–28.1 [31]; 14 [30]           | 8.2–15.6 [32]                |
| $1/\gamma_s$       | 4 [28]; 1–3.2 [33]                           | 0.8–8.2 [34]                      | 0.8–8.2 [34]                 |
| $\beta$            | 0.04375 [28]; 0.075 [35];<br>0.002–0.36 [33] | 0.14 [36]                         | 0.1–0.3*                     |
| $\tau$             | 0–0.3*                                       | 0.0277–0.0997*                    | 0–0.5*                       |
| $1/\psi$           | 7 [28]; 14 [24]                              | 8.2–15.6 [32]                     | 8.2–15.6 [32]                |
| $1/\mu$            | 13 [28]; 7 [35]                              | 3–11 [35]                         | 4.7–10.3 [37],<br>11–25 [38] |
| $\pi$              | 0.125 [28]; 0.42 [33]                        | 3.8–14.6 [39]                     | 0–0.4*                       |
| $w_{10}$           | 0.04–0.08*                                   | 0.0296–0.1206*                    | 0.04–0.08*                   |
| $w_{20}$           | 0.003–0.015*                                 | 0.0022–0.0590*                    | 0.007–0.03*                  |

Table 3: Initial parameter ranges and values, taken from current literature or assumed (\*) by the researcher.

- 13 • **Empirical constraint on prevalence:** A study carried out in Spain shed some light about  
 14 the highest prevalence percentage in that country, with an estimation around 21.6% [40].



1 Considering this result, we decided to include solutions where the cumulative number of  
2 infected people, since the first case until day 200, were at most 21.6% of the total population  
3 in Hermosillo.

4 • **Data:** The dataset used here is the latest public data on COVID-19, available at the offi-  
5 cial website of the Mexican Federal Government [41], updated at July 19, 2020. Taking  
6 into consideration some decisions adopted by the Mexican government, regarding to lift-  
7 ing confinement measures, the study covered a period spanning from March 11 to May 31.  
8 COVID-19 positive cases considered in this study included Hermosillo residents who were  
9 registered in a medical unit in the Sonora state. Variables under study were the symptom  
10 onset case date, hospitalized and ambulatory cases by date of admission to a health service  
11 unit, and also daily deaths.

• **Empirical restriction on epidemic curves:** In order to ensure reasonable solution curves,  
we considered an inclusion criterion that consists on selecting a curve when the sum of  
squared errors about the data was smaller than an upper bound. The reason for adopting this  
criterion was the fact that epidemiological characteristics were not only determined by the  
selected scenarios but also were linked to the actual behavior of the epidemic in Hermosillo,  
Sonora. Next, we briefly describe the steps that were performed to get the upper bounds for  
the sums of squared errors. First, we obtained  $m = 1000$  parameter sets from a scenario and  
then we used them to calculate daily incidence of symptomatic infections, daily incidence  
of hospitalized cases, daily incidence of ambulatory cases, and daily incidence of deaths. In  
order to obtain this information we defined the following variables with respect to the model:

$$\begin{aligned} DI_s(k) &= \int_{k-1}^k \theta \delta E(t), & DH(k) &= \int_{k-1}^k \beta \gamma_s I_s(t), \\ DQ(k) &= \int_{k-1}^k (1 - \beta) \gamma_s I_s(t), & DD(k) &= \int_{k-1}^k \pi \mu H(t), \end{aligned} \quad (2.4)$$

12 where  $DI_s(k)$ ,  $DH(k)$ ,  $DQ(k)$  and  $DD(k)$ , are the number of symptomatic infected, hospi-  
13 talized, ambulatory and death cases, respectively, up to the  $k$ th day. Then, sums of squared  
14 errors were calculated for each selected variable (daily observed incidence of: symptomatic  
15 infections, hospitalized cases, ambulatory cases, and deaths) about the theoretical counter-  
16 part defined in (2.4). Then, for each scenario and for each variable, the 50th percentile of  
17 the sum of the squared errors is computed. Finally, a curve is selected when all of its sum of  
18 squared errors is less than their respective upper bounds.

19 • **Statistics for the analysis:** For each scenario, we obtained its baseline dynamic, selecting  
20 the 5000 solutions from System 2.1, that satisfy the criteria previously explained. Then, we  
21 calculate their corresponding 2.5th, 50th, and 97.5th percentiles. It is important to stress that  
22 each solution were obtained throughout a particular parameter combination, that were used  
23 later to explore other dynamics related to dates of lockdown implementation and levels of  
24 relaxation.

### 1 3 Results

2 In this section, we applied the methodology previously explained to compute three parameter sets  
 3 that are used to define our baseline scenarios. Then, the strengths and weaknesses of our results are  
 4 discussed. Finally, we explored some scenarios regarding possible consequences of i) change of  
 5 dates for implementing mitigation measures, and ii) lifting mitigation measures on June 01, 2020.

#### 6 3.1 About the ACME occurring time

7 Based on the three scenarios previously considered, we obtained the quantile-based intervals shown  
 8 in Table 4. Fig 2 increased our knowledge about the parameters behavior, providing, for each pa-  
 9 rameter and each scenario, some interesting complementary information. In these plots we can  
 10 observe that in some cases, there is no intersection between these empirical distributions, while in  
 11 others a considerable overlap occurs. This illustrates a well known problem of parameter identifi-  
 12 ability where basically, for the same data set, different parameter regions could validate the data; this  
 13 can actually be observed in Fig 3. It follows then that solutions obtained throughout System 2.1,  
 14 under three different scenarios, should not be expected always to be close solutions; so therefore,  
 15 it could be risky to assign a predictive nature to our model.

|                    | Scenario 1 |        |        | Scenario 2 |        |        | Scenario 3 |        |        |
|--------------------|------------|--------|--------|------------|--------|--------|------------|--------|--------|
|                    | 2.5%       | 50%    | 97.5%  | 2.5%       | 50%    | 97.5%  | 2.5%       | 50%    | 97.5%  |
| $\alpha_a$         | 1.2251     | 1.2458 | 1.2657 | 1.2991     | 1.4573 | 1.5577 | 1.1102     | 1.2041 | 1.3017 |
| $\alpha_s$         | 1.1239     | 1.2067 | 1.2846 | 0.8795     | 0.9305 | 0.9903 | 0.5645     | 0.6601 | 0.7553 |
| $\tilde{\alpha}_a$ | 0.0007     | 0.0114 | 0.0304 | 0.0005     | 0.0082 | 0.0147 | 0.0019     | 0.0342 | 0.1017 |
| $\tilde{\alpha}_s$ | 1.1931     | 1.2010 | 1.2085 | 0.2981     | 0.4270 | 0.5374 | 0.0018     | 0.0415 | 0.1241 |
| $\hat{\alpha}_a$   | 0.0557     | 0.1517 | 0.2445 | 0.0018     | 0.0342 | 0.0752 | 0.0018     | 0.0371 | 0.1129 |
| $\hat{\alpha}_s$   | 0.4876     | 0.5796 | 0.6526 | 0.7445     | 0.8643 | 0.9742 | 0.0019     | 0.0417 | 0.1242 |
| $\delta$           | 0.2573     | 0.2927 | 0.3317 | 0.1789     | 0.2223 | 0.2510 | 0.1604     | 0.2157 | 0.3049 |
| $\theta$           | 0.0194     | 0.1072 | 0.1961 | 0.2274     | 0.2748 | 0.3634 | 0.1720     | 0.2109 | 0.2481 |
| $\eta_a$           | 0.1013     | 0.1470 | 0.1909 | 0.0404     | 0.0479 | 0.0638 | 0.0792     | 0.0954 | 0.1158 |
| $\gamma_s$         | 0.5447     | 1.2334 | 1.9548 | 0.7298     | 1.0890 | 1.7143 | 0.1294     | 0.3300 | 1.0376 |
| $\beta$            | 0.1424     | 0.1877 | 0.2458 | 0.0751     | 0.1049 | 0.1295 | 0.0769     | 0.1386 | 0.2293 |
| $\tau$             | 0.0050     | 0.0885 | 0.1933 | 0.0304     | 0.0636 | 0.0969 | 0.1057     | 0.1972 | 0.2945 |
| $\psi$             | 0.0207     | 0.2466 | 0.4889 | 0.0532     | 0.1065 | 0.1573 | 0.0610     | 0.0797 | 0.0990 |
| $\mu$              | 0.1141     | 0.4374 | 0.7810 | 0.0648     | 0.1067 | 0.1382 | 0.0512     | 0.0744 | 0.0985 |
| $\nu$              | 0.1435     | 0.2067 | 0.2926 | 0.1048     | 0.1632 | 0.2314 | 0.2058     | 0.2944 | 0.3941 |
| $w_{10}$           | 0.0484     | 0.0590 | 0.0738 | 0.0755     | 0.0786 | 0.0854 | 0.0519     | 0.0631 | 0.0776 |
| $w_{20}$           | 0.0033     | 0.0089 | 0.0147 | 0.0007     | 0.0121 | 0.0302 | 0.0076     | 0.0191 | 0.0294 |

Table 4: Median and 95% quantile-based intervals for parameters in System 2.1.

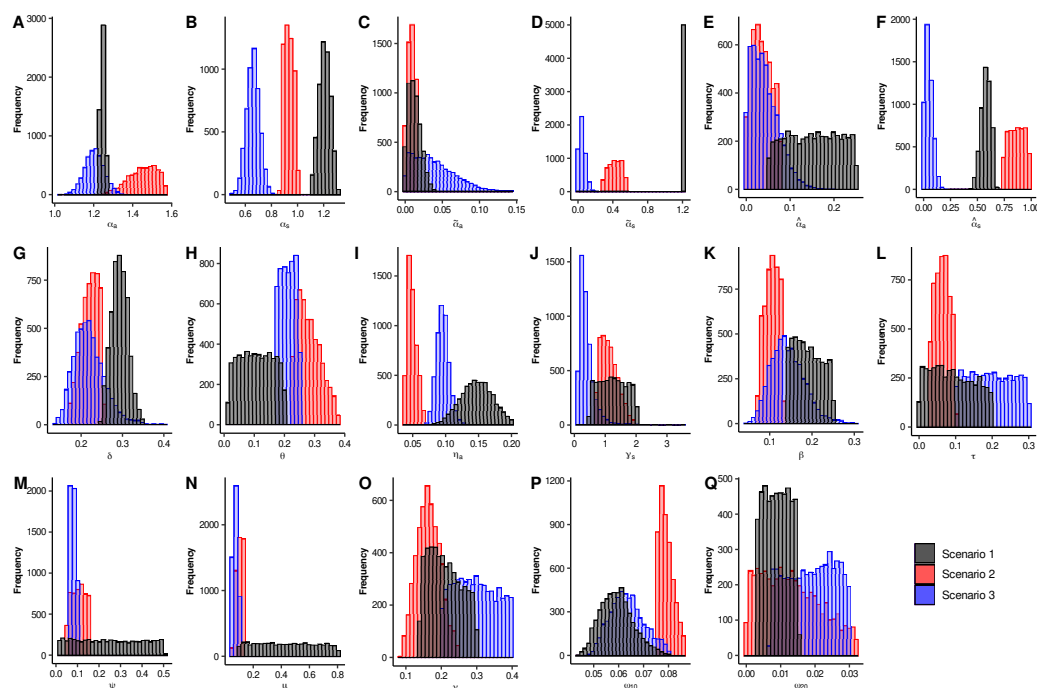

Figure 2: **Histogram for each one of the parameters of System 2.1.** Black, red and blue bars are related to Scenarios 1, 2, and 3, respectively.

1 To complement the fact previously exposed, we included Fig 4, where the distribution of the maximum number of daily new reported, hospitalized, and deaths can be observed. As expected, the  
 2 maximum number of daily new reported, hospitalized, and deaths can be observed. As expected, the  
 3 three scenarios provided solutions that in general do not coincide in the ACME levels. However,  
 4 our study gave us some certainty in another aspect. For the three scenarios, Fig 5 shows the distributions of the estimated date of the ACME for the daily new reported, hospitalized, and death  
 5 variables. Here, we can clearly observe that Scenarios 2 and 3 presented very similar distributions  
 6 for these three variables. In contrast, histograms for Scenario 1 are flattened, their beginning is  
 7 too early, and they ended almost at the same dates of Scenarios 2 and 3. Actually, quantile-based  
 8 intervals for Scenario 1 will almost contain the ones corresponding to Scenarios 2 and 3. These results indicate that even when parameters do not provide consistent information about the intensity  
 9 of the outbreak, it did preserve the property of having an ACME occurring time in a specific time  
 10 interval.  
 11  
 12

### 13 **3.2 Implications of Lockdown occurrence time.**

14 Based on System 2.1 and the parameter ranges and values obtained in previous section, we evaluated implications on the magnitude of the variables of interest, if the lockdown had been im-  
 15 plemented one or two weeks later than our real scenario. This exploration intends to analyze the  
 16

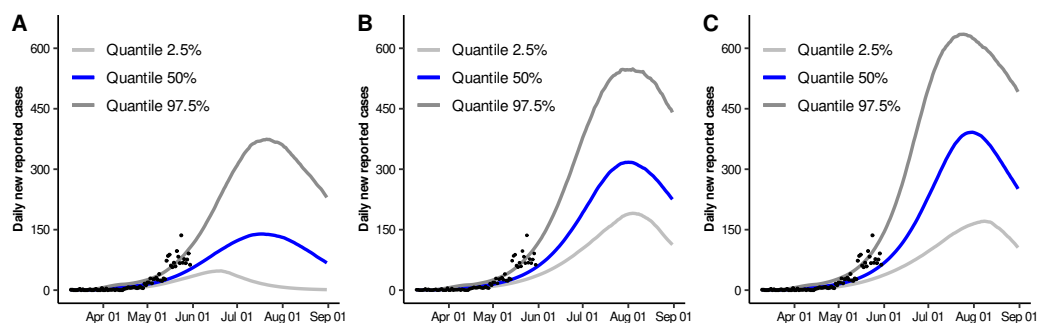

Figure 3: **95% quantile-based intervals and median estimates for daily new reported cases.** A) Dynamics for scenario 1. B) Dynamics for scenario 2. C) Dynamics for scenario 3. Black dots represent available data from March 11 to May 31.

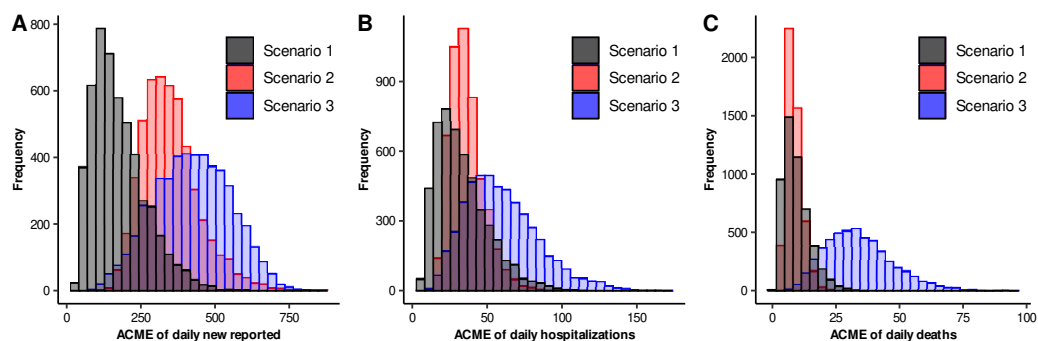

Figure 4: **Histograms of ACME levels for different epidemic curves.** Black, red and blue bars are related to Scenarios 1, 2, and 3, respectively. A) ACME of daily new reported cases. B) ACME of daily hospitalizations. C) ACME of daily deaths.

1 possible consequences of a late decision making. For our simulations, we used 5000 parameter  
 2 combinations of scenario 2, and calculated the quantile 0.5 of all these solutions. Here, we ba-  
 3 sically present hospitalized prevalence, in order to relate this with bed saturation and cumulative  
 4 deaths.

5 It is important to have in mind that in real setting, lockdown took place from March 16 to April 15  
 6 (Baseline). Therefore, we carried out these simulations, for Scenario 2, considering that lockdown  
 7 took place over a time interval from March 23 to April 22 (Intervention A) and also from March  
 8 30 to April 30 (Intervention B). Fig 6 shows the solution for Baseline and these interventions, for  
 9 Scenario 2. From the figure, we can observe that a considerable increase in the number of daily  
 10 new hospitalizations and deaths would occur if distancing measures were taken two weeks after  
 11 the original date, exhibiting the importance of timely decision making.

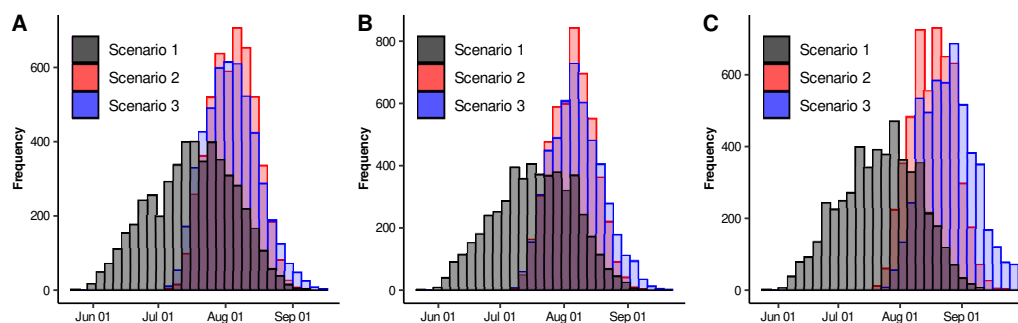

Figure 5: **Histograms of ACME dates for different epidemic curves.** Black, red and blue bars are related to Scenarios 1, 2, and 3, respectively. A) ACME of daily new reported cases. B) ACME of daily hospitalizations. C) ACME of daily deaths.

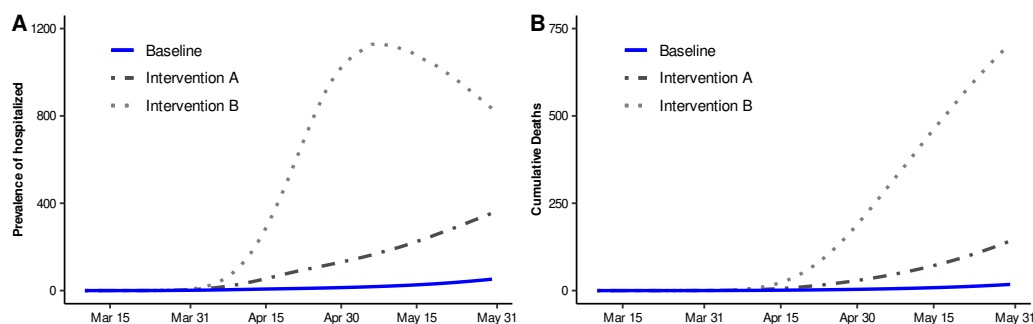

Figure 6: **Median estimates for some epidemic curves.** Blue solid line represents our baseline dynamics for Scenario 2. Dotted-dashed line represents Intervention A, whose mitigation measures are supposed to start on March 23. Dotted line represents Intervention B, whose mitigation measures are assumed to begin on March 30. A) Prevalence of hospitalized. B) Cumulative deaths.

### 1 3.3 Possible consequences of lifting mitigation measures

2 On June 01, 2020, Mexican Federal Government established an epidemiological panel. The pur-  
 3 pose of this panel was to assign a color (red, orange, yellow, green) to each one of the states of  
 4 Mexico, and gradually lift mitigation measures, depending on the color assigned to each one of the  
 5 states. However, as a result of this strategy, an unknown number of people returned to their usual  
 6 activities since June 01, 2020, independently of the color that this panel assigned to a state. Mo-  
 7 tivated by this fact, that also occurred in Hermosillo, Sonora, we explored possible consequences  
 8 that lifting mitigation measures could have on daily new cases, daily new hospitalizations and daily  
 9 deaths.

1 Fig 7 shows some epidemic curves under Scenario 2. Here, each curve represents quantile 0.5  
2 of all solutions when considering different proportions of individuals returning to usual activities  
3 on June 01, 2020. Baseline curve (solid blue line) represents disease dynamics without lifting  
4 mitigation measures. The scenarios named Lifting A, B, and C were constructed considering that  
5 approximately 16%, 33%, and 66% of the population, that fulfilled with social-distancing mea-  
6 sures, returned to their usual activities on June 01, 2020, respectively. Here, we can deduce that the  
7 number of people returning to their usual activities, is directly affecting the ACME level of these  
8 epidemic curves, which also depend on the adopted social-distancing measures. The latter will  
9 be discussed on Supplementary Material. Finally, it is important to have in mind that the Monte  
10 Carlo study considered data reported up to May 31, since in June 01, mitigation measures were  
11 relaxed, causing an increase in mobility. For scenario 2, when comparing our results with the data  
12 reported up to August 14, a poor fitting can be observed in some periods. However, it is important  
13 to mention that there is a delay in the information reported by the Federal Government since, as of  
14 August 14, this entity reported 8535 cumulative infected, while the Sonora Government reported  
15 11362 cumulative infected. The latter makes us think that the adjustment presented for the new  
16 daily cases is good. Supplementary Material includes these analyses under Scenarios 1 and 3, and  
17 similar characteristics were observed.

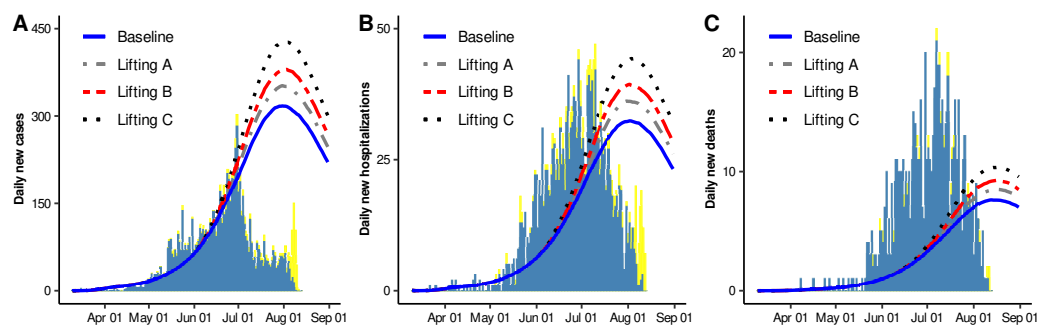

Figure 7: **Median estimates for A) Daily new cases, B) Daily new hospitalizations, and C) Daily new deaths.** Blue solid line represents our baseline dynamics. Grey dotted-dashed, red dashed and black dotted lines represent that approximately 16%, 33%, and 66% of the population that fulfilled with social-distancing measures returned to their usual activities on June 01, 2020, respectively. Blue and yellow bars represent confirmed and suspected+confirmed data for Hermosillo, Sonora, Mexico.

## 18 4 Discussion

19 The comprehension of the COVID-19 epidemic has become a major interest area of study due not  
20 only to the lives that have been lost worldwide but also to the economic damages that caused to

1 different regions in the world. Nowadays, data availability about this epidemic has allowed to show  
2 how different mathematical models and statistical techniques are useful for providing valuable  
3 information related to decision making, in many particular regions. Moreover, these models are  
4 setting the basis for preventing and controlling more catastrophic scenarios in a possible second  
5 wave or under the presence of a different propagating virus.

6 In particular, our interest was to build a model that considered the government interventions in the  
7 Sonora state, in Mexico. The original question, as in many other places of the world, was to propose  
8 control strategies when releasing population to their daily activities, being in control regarding the  
9 number of seriously ill individuals and availability of hospital facilities. At that time, there were  
10 few available data to come up with a good estimate and answer such a question. For that reason,  
11 our results were merely qualitative [42].

12 In this work, we proposed a mathematical model to study COVID-19 dynamics in Hermosillo,  
13 Sonora, Mexico. Here, we assessed the timing to implement different social-distancing scenarios  
14 during COVID-19 epidemic and explored different levels of mitigation-measure relaxation. We  
15 followed a two-step approach to achieve our aims. First, we conducted a Monte Carlo study, and  
16 under three different scenarios, some epidemic curves are fitted. As a result, we obtained a baseline  
17 with adequate properties when providing an approximation to the occurring time of the epidemic  
18 peak. According to our findings, the median dates for the ACME of incidence cases would occur  
19 between July 18 and August 6. These results were consistent with ongoing surveillance data pro-  
20 vided by local health authorities, which reported the incidence peak by the 31st epidemiological  
21 week (July 27 – August 2). Since then, decrements have been observed for incidence cases and  
22 hospitalizations [43]. In summary, our model described well the epidemic dynamic and the impact  
23 of lockdown intervention measures throughout time.

24 On the other hand, some differences were observed between Scenarios 1, 2 and 3, when estimating  
25 the number of cases. Specifically, the three scenarios fitted the data properly, but they did not  
26 coincide in the magnitude of the outbreak (Fig 3). Overall, it is not clear which one provides the  
27 better fitting. In that sense, it is meaningless to talk about predictability on the intensity of the  
28 outbreak, with a model like the one considered here. Nevertheless, the three scenarios agreed on  
29 what is called the ACME occurring time, so there might be information contained in the structure  
30 of the epidemic and in the model itself that might lead us to observe these results. However, as  
31 we know, mathematical models can serve to understand some properties of the evolution of the  
32 disease, qualitatively. In this work, we have obtained three-parameter distribution sets that adjust  
33 the data. In all scenarios,  $\alpha_a$ ,  $\tilde{\alpha}_a$  and  $\hat{\alpha}_a$ , which are the infection rates for the Susceptible, Protected  
34 and Released Protected individuals, respectively, the order relation  $\tilde{\alpha}_a \leq \hat{\alpha}_a \leq \alpha_a$  is satisfied. Thus,  
35 the three scenarios are valid in the way we conceive the model. However, the intensity described  
36 by each scenario tells us a different story. In Scenario 3, the results claim that released protected,  
37 and protected people infect at the same rate. In other words, people that have returned to their  
38 daily activities are protecting themselves as if they still were in the protected class. Whether or not  
39 this situation really happened, a conclusion is that specific pieces of information, from a particular  
40 place, could be used to discriminate spurious solutions and head toward having a predictive nature  
41 of these results.



1 Once we acknowledged the properties of the model and its limitations, we were able to use it to  
2 assess and compare our baseline with different lockdown scenarios. Our findings suggest that a hy-  
3 pothetical delay of two weeks (intervention B) for the implementation of the lockdown measures  
4 would result in an early peak (May 9). Moreover, the two weeks delay considered in intervention B,  
5 would increment in about 42 times the cumulative deaths, when compared to the ones observed un-  
6 der baseline, by May 31. In the absence of a vaccine or an effective treatment, the implementation  
7 of social distancing measures at the early stages of this pandemic, helped to delay and slowdown  
8 the epidemic dynamic, allowing to gain time to strengthen healthcare capacities, avoiding being  
9 overwhelmed by an excessive demand.

10 Lifting mitigation measures showed considerable changes in daily cases, hospitalizations, and  
11 deaths, depending on the proportion of people released to the public space, on June 01. Fig 7A  
12 shows that ACME levels varied from 11% to 35% at the peak of the outbreak compared to base-  
13 line. Our conclusion regarding this issue must be conservative, since these results clearly depend  
14 on the population proportion who returned to usual activities. An important factor that influences  
15 on the magnitude of this proportion, is the poverty level. According to official data, 35% of the  
16 occupied labor force have informal jobs [44], and 19% lives in poverty condition [45]. Economic  
17 inequalities contribute to impeding that a significant proportion of people could maintain a rig-  
18 orous lockdown, since their conditions force them to return to work. Improvements not just in  
19 surveillance but social data, at local level, will benefit future estimations.

20 As a final note, the inclusion of the vital dynamics in the model can be useful when studying the  
21 evolution of the disease for longer periods. For example, it can be helpful to provide qualitative  
22 information on a possible second outbreak that might occur during the flu season, which runs from  
23 September to January.

## 24 **Acknowledgments**

25 We sincerely thank to CONACYT for the financial support, under the project 313269: UNISON  
26 COVID-19: Comportamiento del brote epidémico COVID-19 en Sonora, bajo diferentes escenarios  
27 de control. Project Manager: Gudelia Figueroa Preciado.

## 28 **Author Contributions**

29 **Conceptualization:** José A. Montoya-Laos, Manuel A. Acuña-Zegarra, Daniel Olmos-Liceaga,  
30 Pablo A. Reyes-Castro, Gudelia Figueroa-Preciado.

31 **Data curation:** Mayra R. Tocto-Erazo.

32 **Formal analysis:** Mayra R. Tocto-Erazo, Jorge A. Espíndola-Zepeda, José A. Montoya-Laos.

33 **Funding acquisition:** Gudelia Figueroa-Preciado.

34 **Methodology:** Mayra R. Tocto-Erazo, Jorge A. Espíndola-Zepeda, José A. Montoya-Laos, Manuel  
35 A. Acuña-Zegarra, Daniel Olmos-Liceaga.

36 **Project administration:** José A. Montoya-Laos.

- 1 **Software:** Mayra R. Tocto-Erazo, Jorge A. Espíndola-Zepeda, José A. Montoya-Laos, Manuel A.  
2 Acuña-Zegarra.
- 3 **Supervision:** José A. Montoya-Laos, Manuel A. Acuña-Zegarra.
- 4 **Visualization:** Mayra R. Tocto-Erazo, Jorge A. Espíndola-Zepeda.
- 5 **Writing – original draft:** Mayra R. Tocto-Erazo, Jorge A. Espíndola-Zepeda, José A. Montoya-  
6 Laos, Manuel A. Acuña-Zegarra, Daniel Olmos-Liceaga, Pablo A. Reyes-Castro, Gudelia Figueroa-  
7 Preciado.
- 8 **Writing – review & editing:** José A. Montoya-Laos, Manuel A. Acuña-Zegarra, Daniel Olmos-  
9 Liceaga, Pablo A. Reyes-Castro, Gudelia Figueroa-Preciado.

## References

- [1] Wu F, Zhao S, Yu B, Chen YM, Wang W, Song ZG, et al. A new coronavirus associated with human respiratory disease in China. *Nature*. 2020;579(7798):265–269. doi:10.1038/s41586-020-2008-3.
- [2] Wang C, Horby PW, Hayden FG, Gao GF. A novel coronavirus outbreak of global health concern. *The Lancet*. 2020;395(10223):470–473. doi:10.1016/S0140-6736(20)30185-9.
- [3] Dong E, Du H, Gardner L. An interactive web-based dashboard to track COVID-19 in real time. *The Lancet infectious diseases*. 2020;20(5):533–534. doi:10.1016/S1473-3099(20)30120-1.
- [4] COVID-19 Dashboard México;. Available from: <http://datos.covid-19.conacyt.mx/index.php>.
- [5] Wang D, Hu B, Hu C, Zhu F, Liu X, Zhang J, et al. Clinical characteristics of 138 hospitalized patients with 2019 novel coronavirus–infected pneumonia in Wuhan, China. *Jama*. 2020;323(11):1061–1069. doi:10.1001/jama.2020.1585.
- [6] Wang C, Deng R, Gou L, Fu Z, Zhang X, Shao F, et al. Preliminary study to identify severe from moderate cases of COVID-19 using combined hematology parameters. *Annals of Translational Medicine*. 2020;8(9). doi:10.21037/atm-20-3391.
- [7] Sun P, Qie S, Liu Z, Ren J, Li K, Xi J. Clinical characteristics of hospitalized patients with SARS-CoV-2 infection: a single arm meta-analysis. *Journal of medical virology*. 2020;92(6):612–617. doi:10.1002/jmv.25735.
- [8] Davies NG, Kucharski AJ, Eggo RM, Gimma A, Edmunds WJ, Jombart T, et al. Effects of non-pharmaceutical interventions on COVID-19 cases, deaths, and demand for hospital services in the UK: a modelling study. *The Lancet Public Health*. 2020;doi:10.1016/S2468-2667(20)30133-X.

- [9] Kucharski AJ, Russell TW, Diamond C, Liu Y, Edmunds J, Funk S, et al. Early dynamics of transmission and control of COVID-19: a mathematical modelling study. *The lancet infectious diseases*. 2020;doi:10.1016/S1473-3099(20)30144-4.
- [10] Acuerdo por el que se establecen las medidas preventivas que se deberán implementar para la mitigación y control de los riesgos para la salud que implica la enfermedad por el virus SARS-CoV2 (COVID-19);. Available from: [https://www.dof.gob.mx/nota\\_detalle.php?codigo=5590339&fecha=24/03/2020](https://www.dof.gob.mx/nota_detalle.php?codigo=5590339&fecha=24/03/2020).
- [11] Haffajee RL, Mello MM. Thinking globally, acting locally—The US response to COVID-19. *New England Journal of Medicine*. 2020;382(22):e75. doi:10.1056/NEJMp2006740.
- [12] Anastassopoulou C, Russo L, Tsakris A, Siettos C. Data-based analysis, modelling and forecasting of the COVID-19 outbreak. *PloS one*. 2020;15(3):e0230405. doi:10.1371/journal.pone.0230405.
- [13] Chatterjee K, Chatterjee K, Kumar A, Shankar S. Healthcare impact of COVID-19 epidemic in India: A stochastic mathematical model. *Medical Journal Armed Forces India*. 2020;doi:10.1016/j.mjafi.2020.03.022.
- [14] Giordano G, Blanchini F, Bruno R, Colaneri P, Di Filippo A, Di Matteo A, et al. Modelling the COVID-19 epidemic and implementation of population-wide interventions in Italy. *Nature Medicine*. 2020; p. 1–6. doi:doi.org/10.1038/s41591-020-0883-7.
- [15] Vega DI. Lockdown, one, two, none, or smart. Modeling containing COVID-19 infection. A conceptual model. *Science of the Total Environment*. 2020; p. 138917. doi:10.1016/j.scitotenv.2020.138917.
- [16] Lin Q, Zhao S, Gao D, Lou Y, Yang S, Musa SS, et al. A conceptual model for the outbreak of Coronavirus disease 2019 (COVID-19) in Wuhan, China with individual reaction and governmental action. *International journal of infectious diseases*. 2020;doi:10.1016/j.ijid.2020.02.058.
- [17] Prem K, Liu Y, Russell TW, Kucharski AJ, Eggo RM, Davies N, et al. The effect of control strategies to reduce social mixing on outcomes of the COVID-19 epidemic in Wuhan, China: a modelling study. *The Lancet Public Health*. 2020;doi:10.1016/S2468-2667(20)30073-6.
- [18] Mandal M, Jana S, Nandi SK, Khatua A, Adak S, Kar T. A model based study on the dynamics of COVID-19: Prediction and control. *Chaos, Solitons & Fractals*. 2020; p. 109889. doi:10.1016/j.chaos.2020.109889.
- [19] Jewell NP, Lewnard JA, Jewell BL. Predictive mathematical models of the COVID-19 pandemic: Underlying principles and value of projections. *Jama*. 2020;323(19):1893–1894. doi:10.1001/jama.2020.6585.

- [20] Roda WC, Varughese MB, Han D, Li MY. Why is it difficult to accurately predict the COVID-19 epidemic? *Infectious Disease Modelling*. 2020;doi:10.1016/j.idm.2020.03.001.
- [21] Consejo Nacional de Población (CONAPO). Proyecciones de la Población de los Municipios de México, 2015-2030; 2020 (accessed August 14, 2020). <https://datos.gob.mx/busca/dataset/proyecciones-de-la-poblacion-de-mexico-y-de-las-entidades-federativas-2016-2050>.
- [22] Tocto Erazo MR. Shiny app script; 2020. [https://github.com/BioMatUnison/COVID-19\\_Proyect/tree/master/AppModel](https://github.com/BioMatUnison/COVID-19_Proyect/tree/master/AppModel).
- [23] Liu X, Hewings GJ, Wang S, Qin M, Xiang X, Zheng S, et al. Modeling the situation of COVID-19 and effects of different containment strategies in China with dynamic differential equations and parameters estimation. *medRxiv*. 2020;doi:10.1101/2020.03.09.20033498.
- [24] Chatterjee K, Chatterjee K, Kumar A, Shankar S. Healthcare impact of COVID-19 epidemic in India: A stochastic mathematical model. *Medical Journal Armed Forces India*. 2020;doi:10.1016/j.mjafi.2020.03.022.
- [25] Organization WH. Coronavirus disease 2019 (COVID-19): situation report, 73; 2020-04-02.
- [26] Ganyani T, Kremer C, Chen D, Torneri A, Faes C, Wallinga J, et al. Estimating the generation interval for coronavirus disease (COVID-19) based on symptom onset data, March 2020. *Eurosurveillance*. 2020;25(17):2000257. doi:10.2807/1560-7917.ES.2020.25.17.2000257.
- [27] Linton NM, Kobayashi T, Yang Y, Hayashi K, Akhmetzhanov AR, Jung Sm, et al. Incubation period and other epidemiological characteristics of 2019 novel coronavirus infections with right truncation: a statistical analysis of publicly available case data. *Journal of clinical medicine*. 2020;9(2):538. doi:10.3390/jcm9020538.
- [28] Capistrán MA, Capella A, Christen JA. Forecasting hospital demand during COVID-19 pandemic outbreaks. *arXiv preprint arXiv:200601873*. 2020;.
- [29] Mizumoto K, Kagaya K, Zarebski A, Chowell G. Estimating the asymptomatic proportion of coronavirus disease 2019 (COVID-19) cases on board the Diamond Princess cruise ship, Yokohama, Japan, 2020. *Eurosurveillance*. 2020;25(10):2000180. doi:10.2807/1560-7917.ES.2020.25.10.2000180.
- [30] Mission WCJ. Report of the WHO-China Joint Mission on Coronavirus Disease 2019 (COVID-19). 2020;(16-24 February); 2020. Available from: [https://www.who.int/publications/i/item/report-of-the-who-china-joint-mission-on-coronavirus-disease-2019-\(covid-19\)](https://www.who.int/publications/i/item/report-of-the-who-china-joint-mission-on-coronavirus-disease-2019-(covid-19)).
- [31] Verity R, Okell LC, Dorigatti I, Winskill P, Whittaker C, Imai N, et al. Estimates of the severity of coronavirus disease 2019: a model-based analysis. *The Lancet infectious diseases*. 2020;doi:10.1016/S1473-3099(20)30243-7.

- [32] Lauer SA, Grantz KH, Bi Q, Jones FK, Zheng Q, Meredith HR, et al. The incubation period of coronavirus disease 2019 (COVID-19) from publicly reported confirmed cases: estimation and application. *Annals of internal medicine*. 2020;172(9):577–582. doi:10.7326/M20-0504.
- [33] Arenas A, Cota W, Gomez-Gardenes J, Gómez S, Granell C, Matamalas JT, et al. A mathematical model for the spatiotemporal epidemic spreading of COVID19. *MedRxiv*. 2020;doi:10.1101/2020.03.21.20040022.
- [34] Tian S, Hu N, Lou J, Chen K, Kang X, Xiang Z, et al. Characteristics of COVID-19 infection in Beijing. *Journal of Infection*. 2020;doi:10.1016/j.jinf.2020.02.018.
- [35] Yang X, Yu Y, Xu J, Shu H, Liu H, Wu Y, et al. Clinical course and outcomes of critically ill patients with SARS-CoV-2 pneumonia in Wuhan, China: a single-centered, retrospective, observational study. *The Lancet Respiratory Medicine*. 2020;doi:10.1016/S2213-2600(20)30079-5.
- [36] Stokes EK, Zambrano LD, Anderson KN, Marder EP, Raz KM, Felix SEB, et al. Coronavirus Disease 2019 Case Surveillance—United States, January 22–May 30, 2020. *Morbidity and Mortality Weekly Report*. 2020;69(24):759–765. doi:10.15585/mmwr.mm6924e2.
- [37] Mehra MR, Desai SS, Kuy S, Henry TD, Patel AN. Cardiovascular disease, drug therapy, and mortality in COVID-19. *New England Journal of Medicine*. 2020;doi:10.1056/NEJMoa2007621.
- [38] Lei S, Jiang F, Su W, Chen C, Chen J, Mei W, et al. Clinical characteristics and outcomes of patients undergoing surgeries during the incubation period of COVID-19 infection. *EClinicalMedicine*. 2020; p. 100331. doi:10.1016/j.eclinm.2020.100331.
- [39] Mi Yn, Huang Tt, Zhang Jx, Qin Q, Gong Yx, Liu Sy, et al. Estimating instant case fatality rate of COVID-19 in China. *International Journal of Infectious Diseases*. 2020;97:1–6. doi:10.1016/j.ijid.2020.04.055.
- [40] Pollán M, Pérez-Gómez B, Pastor-Barriuso R, Oteo J, Hernán MA, Pérez-Olmeda M, et al. Prevalence of SARS-CoV-2 in Spain (ENE-COVID): a nationwide, population-based seroepidemiological study. *The Lancet*. 2020;doi:10.1016/S0140-6736(20)31483-5.
- [41] Gobierno de México. Datos Abiertos; 2020 (accessed August 14, 2020). <https://www.coronavirus.gob.mx/datos/>.
- [42] Figueroa Preciado G, Montoya Laos JA, Olmos Liceaga D, Acuña Zegarra MA, Minjárez Sosa JA, Burgos Flores B, et al. Escenarios de Modelación - PROYECTO UNISON COVID-19; 2020. <https://www.unison.mx/wp-content/uploads/2020/05/Reporte-Biomatematica-entregado-a-la-Secretaria-de-Salud-mayo7-2020.pdf>.

- [43] Departamento de Matemáticas-UNISON, Secretaría de Salud-Sonora. Dashboard Unison COVID-19 Sonora; 2020 (accessed August 11, 2020). <https://www.covid19data.unison.mx/#resumen>.
- [44] Instituto Nacional de Estadística y Geografía (INEGI). Encuesta Nacional de Ocupación y Empleo (4 trimestre de 2019); 2020 (accessed August 14, 2020). <https://www.inegi.org.mx/programas/enoe/15ymas/>.
- [45] Consejo Nacional de Evaluación de la Política de Desarrollo Social (CONEVAL). Anexo estadístico de pobreza municipal 2010 y 2015; 2020 (accessed August 11, 2020). [https://www.coneval.org.mx/Medicion/Paginas/AE\\_pobreza\\_municipal.aspx](https://www.coneval.org.mx/Medicion/Paginas/AE_pobreza_municipal.aspx).
